# Supplementary figures and images for: The comprehensive connectome of a neural substrate for ‘ON’ motion detection in Drosophila
Source: eLife journal article supplement (doi:10.7554/elife.24394), 2017-04-22

A

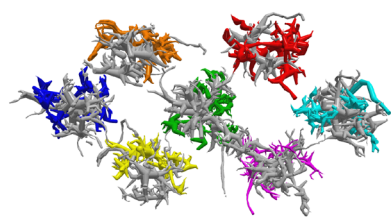

Mi1

B

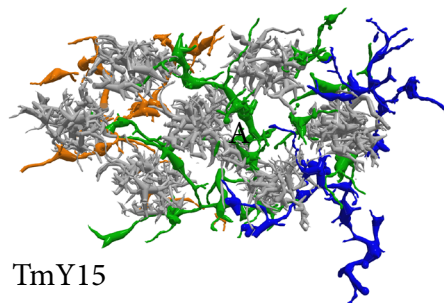

TmY15

C

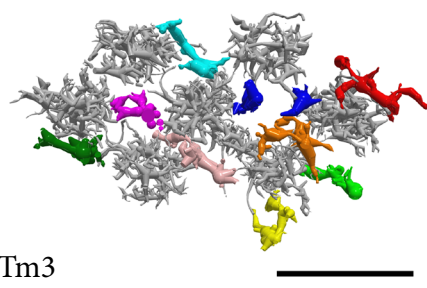

Tm3

D

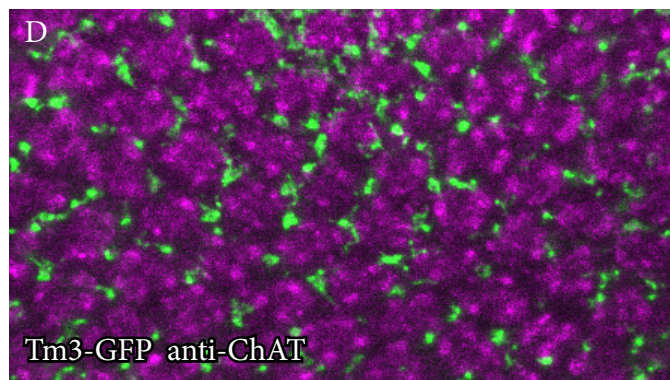

Tm3-GFP anti-ChAT

E

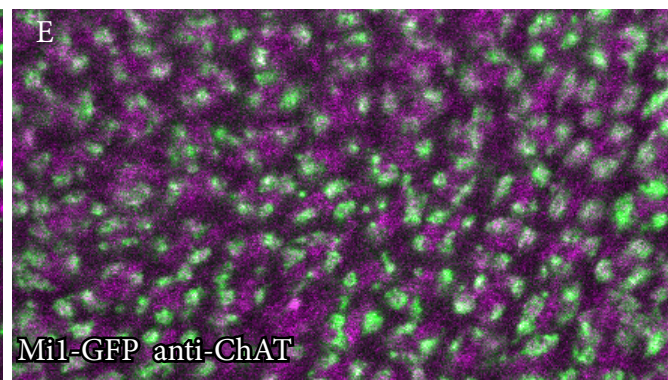

Mi1-GFP anti-ChAT

D'

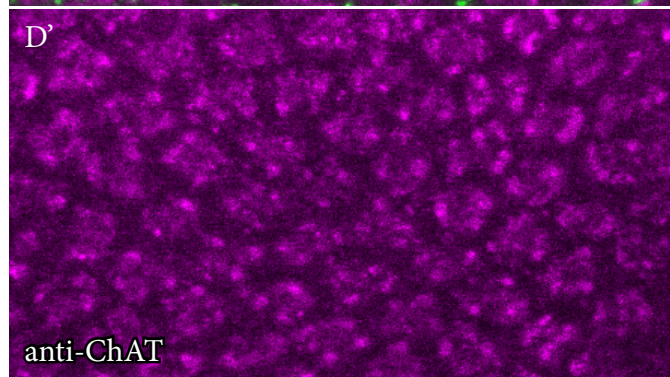

anti-ChAT

E'

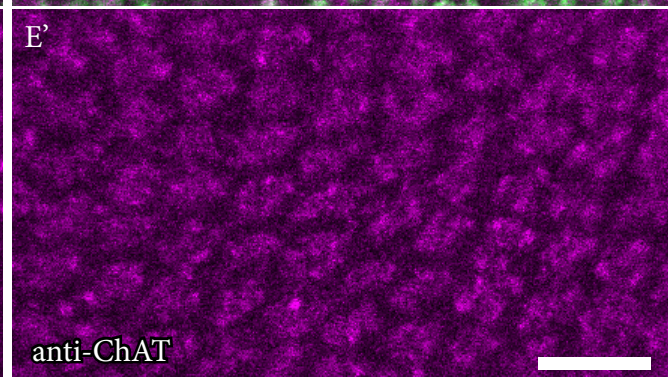

anti-ChAT

Supplement: supp [file elife-24394-supp-v1.zip]

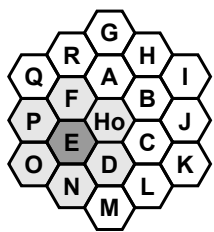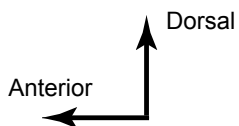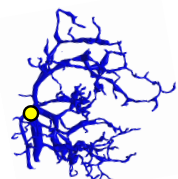

T4a-E

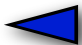

Mi1

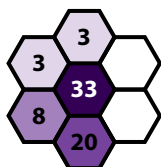

Mi4

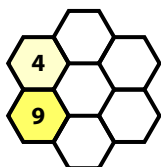

Mi9

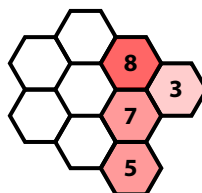

C3

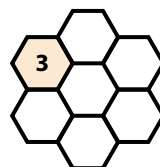

CT1

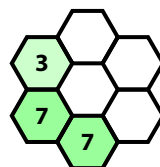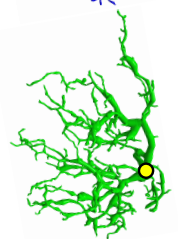

T4b-E

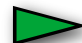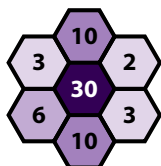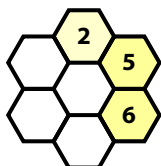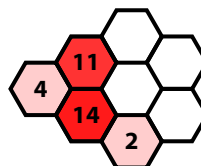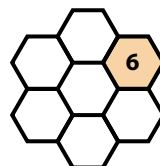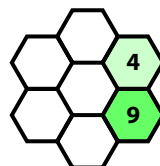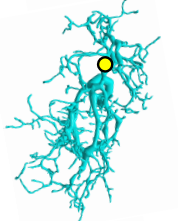

T4c-E

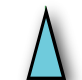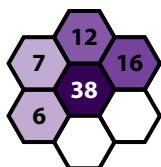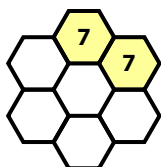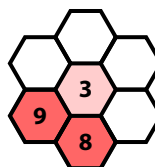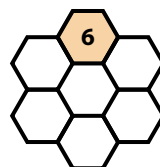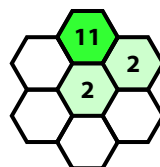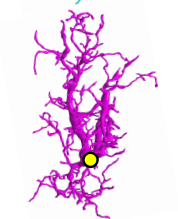

T4d-E

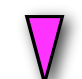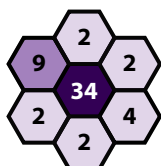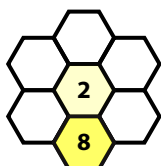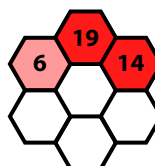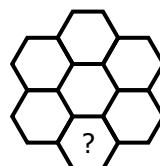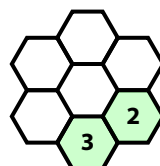

Supplement: supp [file elife-24394-supp-v1.zip]

**A**

ssEM reconstruction volume  
(Takemura et al., 2013)

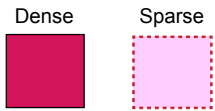

Current FIBSEM  
reconstruction volume

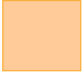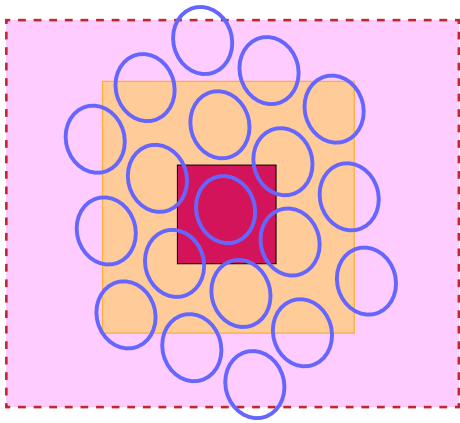

**B**

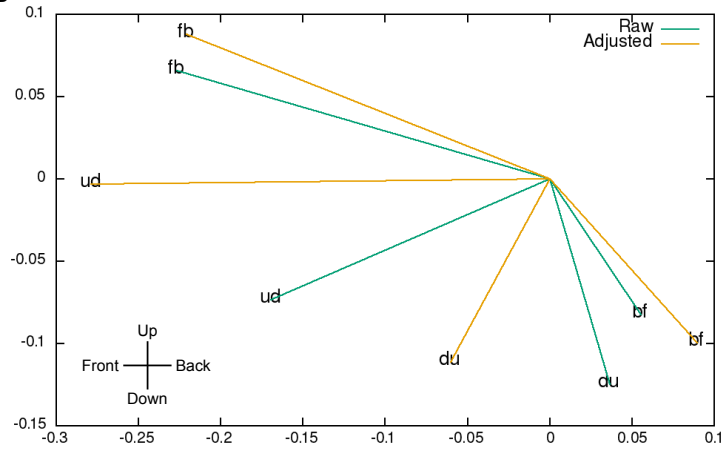

Supplement: supp [file elife-24394-supp-v1.zip]

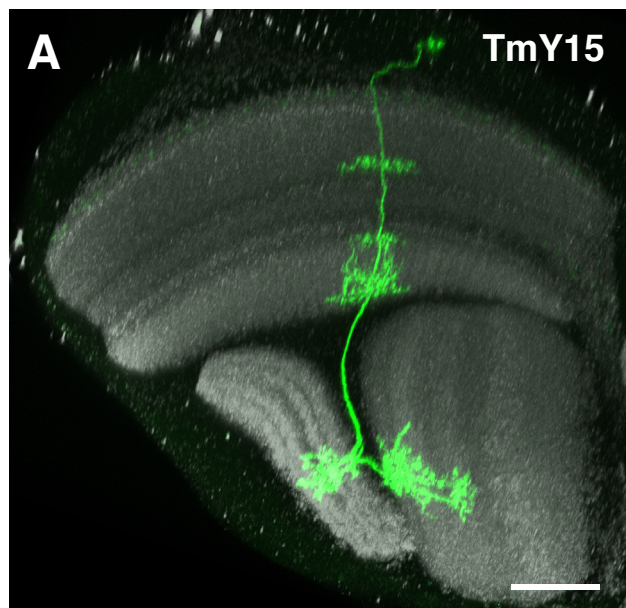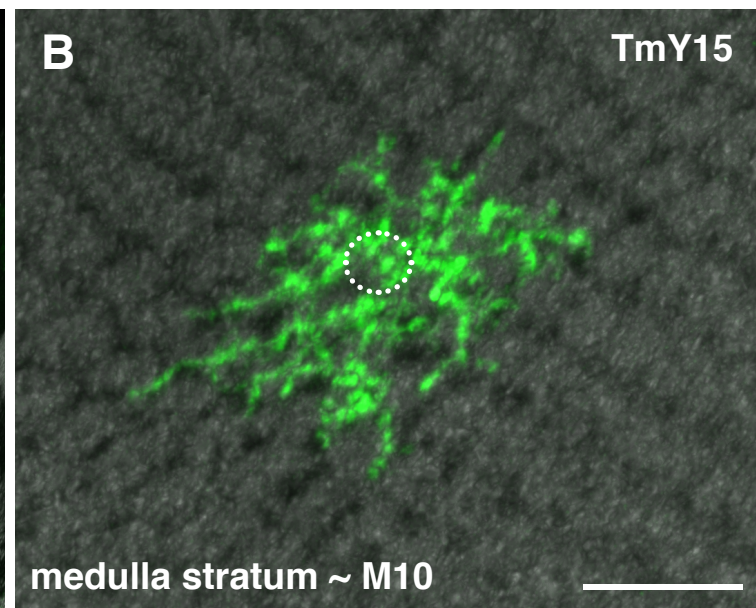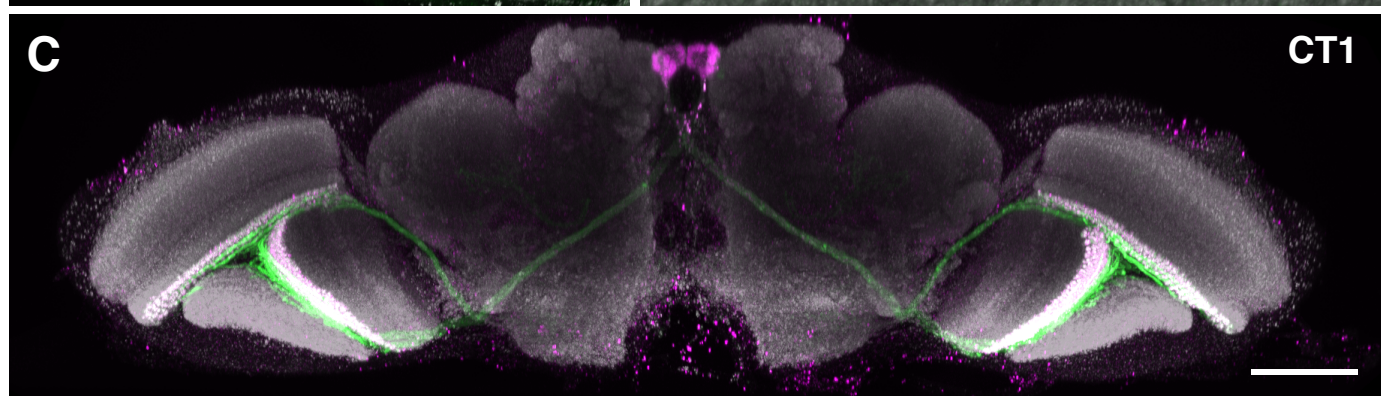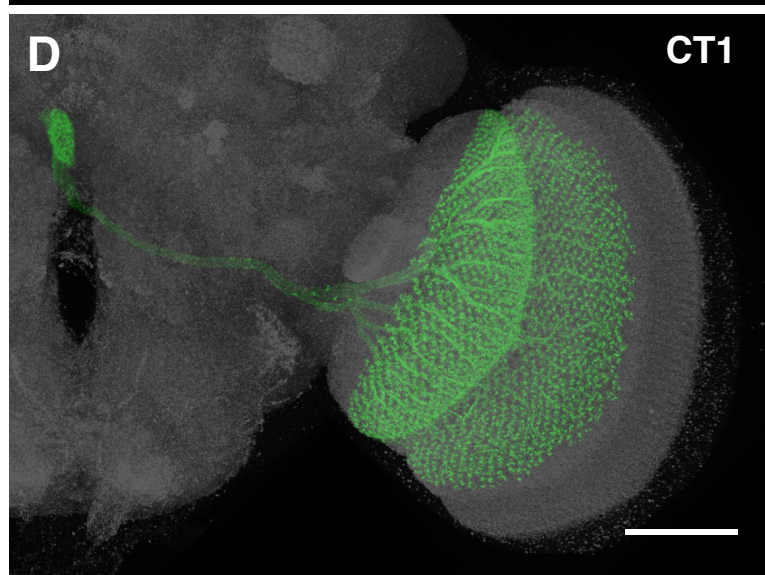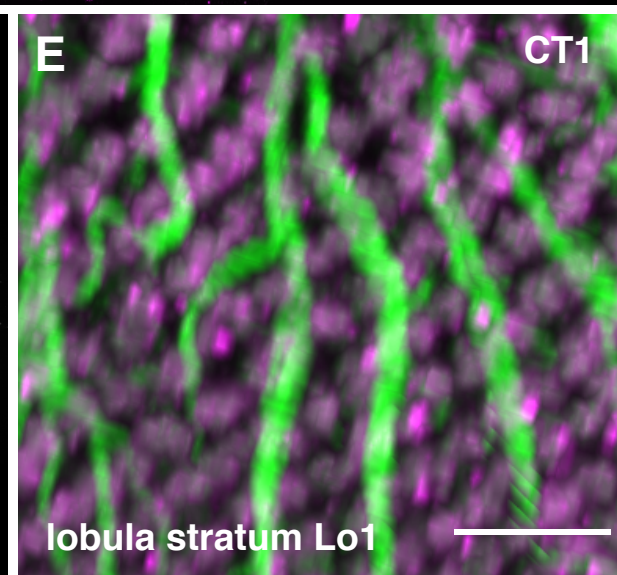

Supplement: supp [file elife-24394-supp-v1.zip]
